# Supplementary material for: Plant-Derived Smoke Affects Biochemical Mechanism on Plant Growth and Seed Germination
Source: PubMed Central journal article supplement (PMC7588921; doi:10.3390/ijms21207760), 2020-10-20
Supplement: ijms-21-07760-s001.pdf [file ijms-21-07760-s001.pdf]

## Supplementary materials

**Table S1.** Effect of plant-derived smoke on germination and post-germination responses of various plants.

| Experimental plant species            | Major findings                                                                                           | References                                        |
|---------------------------------------|----------------------------------------------------------------------------------------------------------|---------------------------------------------------|
| <i>Smoke solution for application</i> |                                                                                                          |                                                   |
| Basterheide                           | Seed germination increased                                                                               | de Lange and Boucher, 1990                        |
| Fire lilly                            | Flowering increased                                                                                      | Keeley, 1993                                      |
| Fynboss plant species                 | Seed germination increased                                                                               | Brown, 1993                                       |
| Restionaceae family species           | Seed germination increased                                                                               | Brown et al., 1994                                |
| Western Australian plants             | Seed germination increased                                                                               | Dixon et., 1995, Tieu et al., 1999                |
| California chaparral plants           | Seed germination increased                                                                               | Flematti et al., 2004                             |
| Whispering bells                      | Seed dormancy released                                                                                   | Keeley and Fotheringham 1998                      |
| Plants from Cape floristic regions    | Seed germination increased                                                                               | Brown, N.A.C.; Botha, 2004                        |
| 12 Poaceae species                    | Seed germination increased                                                                               | Clarke and French, 2005                           |
| Australian Asteraceae                 | Seed germination                                                                                         | Merritt et al., 2006                              |
| 12 eastern Mediterranean basin plants | Seed germination increased                                                                               | Catav et al., 2015                                |
| 10 Interior West Penstemon species    | Seed germination increased                                                                               | Fornwalt, 2015                                    |
| Mediterranean Basin flora             | Seedling emergence was promoted                                                                          | Tormo et al., 2013                                |
| Cape flats sand Fynbos species        | Seedling length and seed germination were promoted                                                       | Mukundamago et al., 2017                          |
| Whispering bells                      | Germination percentage increased                                                                         | Keeley and Fotheringham, 1997                     |
| Red oat grass                         | Germination percentage increased                                                                         | Baxter and van Staden, 1994, Baxter et al., 1994  |
| Stuart's heath                        | Germination percentage increased                                                                         | Keith, 1997                                       |
| Rice                                  | Seed dormancy was released                                                                               | Doherty and Cohn, 2000                            |
| Common oak, Pyrenean oak, Holly oak   | Germination percentage was increased                                                                     | Reyes and Casal, 2006a                            |
| Brown stringy bark, Tasman Heath      | Germination percentage increased                                                                         | Enright and Kintrup, 2001, Gilmour et al., 2000   |
| Pinnate goodenia                      | Germination percentage increased                                                                         | Sugimato and Lidbetter, 2002                      |
| African juniper                       | Germination percentage increased                                                                         | Tigabu et al., 2007                               |
| Princess tree                         | Germination percentage and radical length increased                                                      | Todorovic et al., 2005                            |
| Common geranium                       | Somatic embryogenesis enhanced                                                                           | Senaratna et al., 1999                            |
| Canola                                | Germination percentage and rate, seedling length and weight, plant height and leaf area increased        | Abdollah, 2012                                    |
| Cape snow., Dekriet                   | Germination percentage increased                                                                         | Brown et al., 1998                                |
| Society garlic., Wild garlic          | Seed germination, seedling mass, root length and root number increased                                   | Aremu et al., 2014                                |
| Dyer's woad                           | Seedling mass was increased                                                                              | Zhou et al., 2011                                 |
| Soil seed bank species from Sydney    | Germination percentage increased                                                                         | Thomas et al., 2003                               |
| Edible banana                         | Seedling length, seedling mass, number of shoots, number of roots, number of leaves, leaf area increased | Aremu et al., 2012b                               |
| Wild oat                              | Seed germination increased; seed dormancy was broken                                                     | Adikins and Peters, 2001, Kepczynski et al., 2006 |
| Coyote tobacco                        | Germination percentage increased                                                                         | Schwachtje and Baldwin, 2004                      |
| Coyote tobacco., Whispering bells     | Germination percentage increased                                                                         | Preston et al., 2014                              |
| Rock rose                             | Germination percentage increased                                                                         | Tavsanoglu, 2011                                  |
| Mountain tea., Honeybush Tea          | Germination percentage increased                                                                         | Sutcliffe and Whitehead, 1995                     |

|                                                                    |                                                                                                   |                                      |
|--------------------------------------------------------------------|---------------------------------------------------------------------------------------------------|--------------------------------------|
| Sweet potato                                                       | Number of adventitious roots, length of adventitious roots and length of lateral roots increased  | Aslam et al., 2014                   |
| Pawpaw                                                             | Seed germination rate, seedling length and vigor, and number of leaves increased                  | Chumpookam et al., 2012              |
| Canola                                                             | Plant regeneration, seedling length increased                                                     | Ghazanfaria et al., 2012             |
| Lantana                                                            | Seed germination, germination velocity index and vigor index increased                            | Raizada and Raghubanshi, 2010        |
| Millet                                                             | Seed germination, seedling length and seedling mass were enhanced                                 | Pirzada et al., 2014                 |
| Wild oat                                                           | Germination percentage and per unit weight water content increased, coat rupturing was stimulated | Cembrowska-Lech and Kępczynski, 2017 |
| Carrot                                                             | Seed germination, seedling length increased                                                       | Asaf et al., 2014                    |
| Barnyard grass                                                     | Germination percentage, relative root elongation, seedling length and seedling mass were promoted | Kamran et al., 2014                  |
| Canadian horseweed                                                 | Seed germination, seedling growth increased                                                       | Ren and Bai, 2016                    |
| Wheat                                                              | Germination percentage, germination index, seedling vigor index and seedling length increased     | Iqbal et al., 2016                   |
| Wheat                                                              | Root/shoot length, root fresh/dry weight, shoot fresh/dry weight and leaf area were increased     | Iqbal et al., 2018                   |
| Rice                                                               | Root length and root fresh/dry weights increased                                                  | Akhtar et al., 2017                  |
| Rice                                                               | Seed water uptake and germination percentage were enhanced                                        | Jamil et al., 2020                   |
| Tomato, Cucumber, Pot marigold, Sword lily                         | Seed germination percentage/rate, seedling length and fresh weight increased                      | Elsadek et al., 2019                 |
| Chickpea                                                           | Seed germination, seedling length and mass increased                                              | Rehman et al., 2018                  |
| Maize                                                              | Seed germination, seedling length and mass increased                                              | Aslam et al., 2019                   |
| Lettuce                                                            | Seed germination percentage was promoted                                                          | Gupta et al., 2019                   |
| <b><i>Trimethylebutenolide analogs and butenolide solution</i></b> |                                                                                                   |                                      |
| Lettuce                                                            | Germination percentage increased                                                                  | Posta et al., 2013                   |
| Tangle head                                                        | Germination percentage increased                                                                  | Baldos et al., 2015                  |
| Lettuce                                                            | Germination percentage increased                                                                  | Ghebrehiwot et al., 2013             |
| Lettuce., Whispering bells., Tomato bush                           | Germination percentage increased                                                                  | Flematti et al., 2010                |
| <b><i>Smoke and butenolide solution</i></b>                        |                                                                                                   |                                      |
| Bitter aloe                                                        | Germination percentage increased                                                                  | Bairu et al., 2009                   |
| Tree aloe                                                          | Seed germination and seedling growth increased                                                    | Kulkarni et al., 2013                |
| Lettuce                                                            | Substitute for light, seed germination, seedling length and seedling mass increased               | van Staden et al., 1995              |

|                                                                                                                          |                                                                                                               |                              |
|--------------------------------------------------------------------------------------------------------------------------|---------------------------------------------------------------------------------------------------------------|------------------------------|
| Tropical soda apple                                                                                                      | Seed germination, seedling length and mass increased                                                          | Kandari et al., 2011         |
| Asian mustard                                                                                                            | Germination percentage increased                                                                              | Long et al., 2010            |
| Wild oat, Wimmera ryegrass, Weeping lovegrass, Little seed canary grass, Barley grass, Perennial veldgrass, Ripgut brome | Germination percentage increased                                                                              | Long et al., 2011            |
| Edible banana                                                                                                            | Leaves number, branching, seedling length, seedling weight and root number increased                          | Aremu et al., 2012           |
| onion                                                                                                                    | Number of leaves, leaf length, leaf weight, bulb diameter and bulb weight increased                           | Kulkarni et al., 2010        |
| Okra, Common bean                                                                                                        | Seedling mass, seedling length and leaf number increased                                                      | van Staden et al., 2006      |
| Tomato                                                                                                                   | Seed germination, seedling length and radical emergence increased                                             | Jain, N and van Staden, 2007 |
| Rice                                                                                                                     | Seed germination, seedling weight, number of lateral roots and vigor index increased                          | Kulkarni et al., 2006a       |
| Pineapple flower                                                                                                         | Germination percentage increased                                                                              | Kulkarni et al., 2006b       |
| Candle thorn, Ankle thorn, Black wattle                                                                                  | Seedling mass increased                                                                                       | Kulkarni et al., 2007a       |
| Wild yam                                                                                                                 | Seed germination and seedling vigor index increased                                                           | Kulkarni et al., 2007b       |
| Tomato                                                                                                                   | Stem thickness, leaves number and plant height increased                                                      | Kulkarni et al., 2008        |
| Tomato                                                                                                                   | Seed germination, seedling weight, root length, vigor index, radicle emergence and hypocotyl length increased | Jain et al., 2006            |
| <b>Soybean</b> , Black gram                                                                                              | Roots imitiation and callus formation were stimulated                                                         | Jain et al., 2008a           |
| Tomato                                                                                                                   | Root length and moisture content increased                                                                    | Jain et al., 2008b           |
| Maritime pine, Scots pine, Austrian pine, Mountain pine                                                                  | Germination percentage increased                                                                              | Reyes and Casal, 2006b       |
| Melon                                                                                                                    | Seedling mass increased                                                                                       | Mavi et al., 2010            |
| Torch lily,                                                                                                              | Pollen germination and pollen tube growth was enhanced                                                        | Kumari et al., 2015          |
| Opal flower                                                                                                              | Seed germination was increased, and seed dormancy was broken                                                  | Downes et al., 2010          |
| Button creeper                                                                                                           | Seed germination and somatic embryogenesis were enhanced                                                      | Ma et al., 2006              |
| Tassel rope-rush                                                                                                         | Seed germination and radicle length increased                                                                 | Ren et al., 2017             |
| Kikuyu grass                                                                                                             | Seedling vigor, seedling mass, and leaf number increased                                                      | Okem et al., 2015            |
| Okra                                                                                                                     | Seedling length was increased                                                                                 | Papenfus et al., 2015        |
| <b><i>Glyceronitrile and smoke/butanolide solution</i></b>                                                               |                                                                                                               |                              |
| Kangaroo paw                                                                                                             | Seed germination and embryo growth were increased                                                             | Ma et al., 2018              |
| Kangaroo paw., <i>Gyrostemon</i> , <i>Racemigerus</i> , <i>Gyrostemon ramulosus</i>                                      | Seed germination and seedling length were enhanced                                                            | Downes et al., 2013          |
| <b><i>Aerosol smoke and smoke solution</i></b>                                                                           |                                                                                                               |                              |

---

|                                                                    |                                                                                                           |                                                               |
|--------------------------------------------------------------------|-----------------------------------------------------------------------------------------------------------|---------------------------------------------------------------|
| Chebolic myrobalan., Kurchi, Asian pigeonwings., Gurmar            | Germination percentage, vigor index and seedling height increased; seedling survival and health were good | Maitbadil and Kumar, 2006                                     |
| <i>Arabidopsis</i>                                                 | Seed germination and hypocotyl length was increased; and seed dormancy was broken                         | Nelson et al., 2009, Nelson et al., 2010, Nelson et al., 2011 |
| <b><i>Foliar applications of smoke and butenolide solution</i></b> |                                                                                                           |                                                               |
| Okra, Tomato                                                       | Seedling mass, number of leaves, total leaf area and stem thickness were increased                        | Kulkarni et al., 2007a                                        |
| <b><i>Smoke and PGPR solution</i></b>                              |                                                                                                           |                                                               |
| Rice                                                               | Seed germination and shoot/root lengths were increased                                                    | Khan et al., 2017                                             |

---
